# Supplementary material
Source: HighWire-hosted journal article supplement (https://bmjopenrespres.bmj.com/content/4/1/e000203)
Supplement: inline-supplementary-material-1 [file inline-supplementary-material-1.pdf]

**PROFORMA**

Name of the School: .....

School type: Government/Private

Address: .....

Name of the student: .....

Class: .....

Age ----- Gender: Male/ Female

Religion: Hindu/Buddhist/Christian/Muslim/Any other (Specify).

Ethnicity: Brahmin/Chhetri/Newar/Mongolian/Madhesi/Dalit

**Hostel**

Staying in the Hostel: Yes/No

**Student**

1. Has immunization been done: Yes/No; If yes, which vaccines have been taken?

**Vaccines:**

BCG..... (BCG scar Present/Absent)

DPT 1..... DPT2.....DPT 3.....

ANY OTHERS.....

2. History of Upper Respiratory Tract Infection (URI)? Yes/No

➤ If yes when was the last episode?

Last week/Last month/Last three months/Last six months/Last one year

➤ Are medicines being taken for Upper Respiratory tract Infection (URI)? Yes/No

If yes when and which antibiotics.....

3. Does he/she suffer from repeated throat infection? Yes/No

➤ If yes how many times in a year?

1 time/2 times/3 times/4 times/>4 times

4. Has he/she undergone tonsillectomy? Yes/No

5. Has he/she undergone surgery for DNS? Yes/No

If yes when .....

6. Is there any history of Rheumatic fever characterized by (High Grade Fever/Sore Throat/Joint Pain etc): Yes/No

7. Is there any history of Rheumatic Heart disease/nephritis: Yes/No

8. If answer to question 6 is yes, is the child on prophylactic antibiotic against RHD? Yes/ No

If yes what are the medicines being taken? Long Acting Penicillin/ Erythromycin

Others .....

9. Examination of throat: .....

### **TONSILS**

Normal/ Enlarged/ Congested/ Inflamed

Throat swab taken on: .....

Taken by: .....

Sent to Dept. of Microbiology on: .....

Throat swab examination results: .....
